# Supplementary material for: Cheer Pheasant (Catreus wallichii) and the Conservation Paradox: Importance of Unprotected Areas
Source: MDPI journal article supplement (doi:10.3390/d14100785), 2022-09-21
Supplement: s1 [file s1]

Archive with 1 entries (1 files):
- diversity-1884991-supplementary.pdf
