# Supplementary material for: Cheer Pheasant (Catreus wallichii) and the Conservation Paradox: Importance of Unprotected Areas
Source: MDPI journal article supplement (doi:10.3390/d14100785), 2022-09-21
Supplement: s1 [file s1 › diversity-1884991-supplementary.pdf]

Supplementary Data

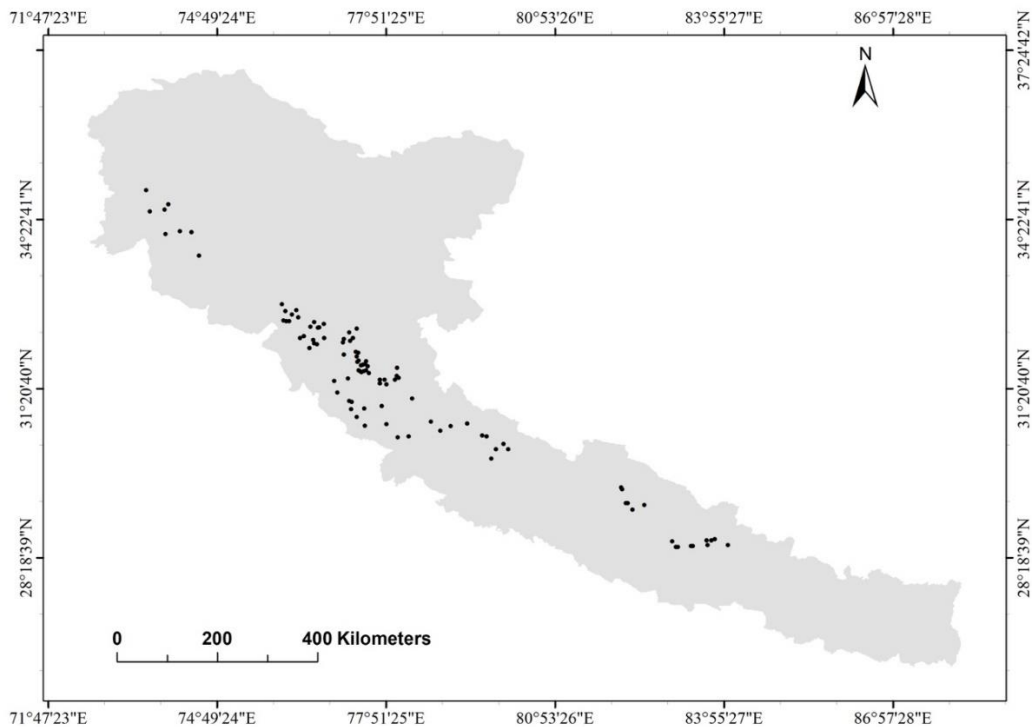

Figure S1. Map of 99 Cheer pheasant locations used in the analysis.

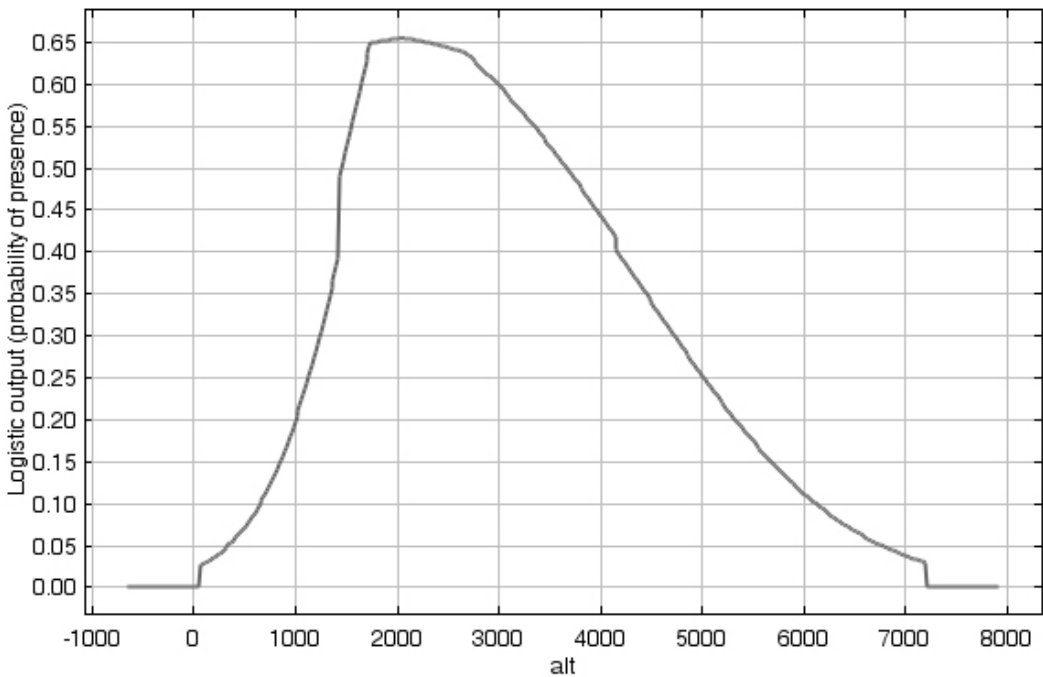

Figure S2. Elevation response curve from the Maxent model.

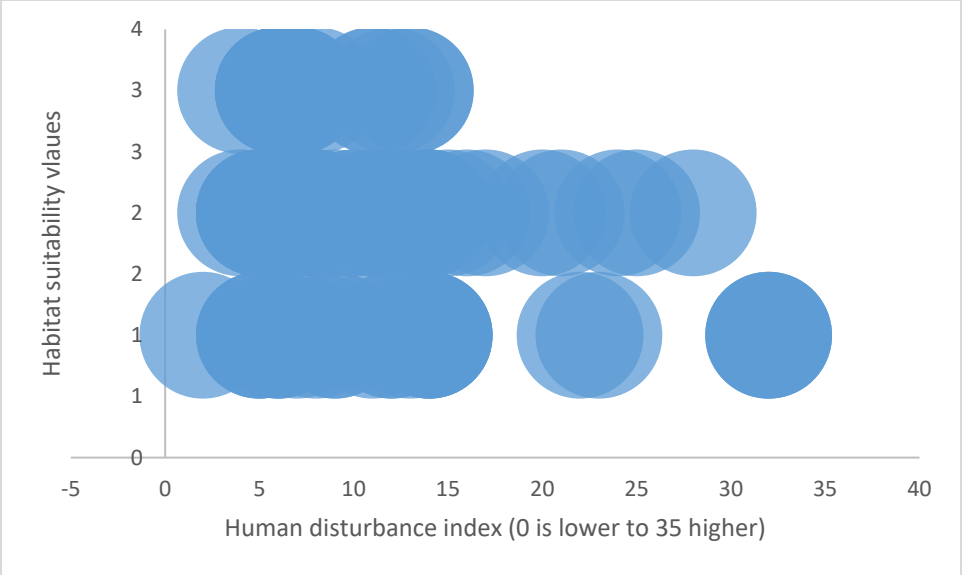

**Figure S3. Human disturbance response to cheer habitat suitability.**
